# Supplementary material
Source: PubMed Central journal article supplement (PMC4813483)

**Supplemental Figure 1. Human p120 RasGAP is expressed in p120RasGAP-deficient rat embryonic cortical neurons**

Control (CTL) or p120RasGAP (RASA) siRNA was electroporated in E18 embryonic rat cortical neurons at 0 DIV with control vector or full-length (FL) human p120RasGAP with pGFP as a transfection reporter plasmid. (A) The cortical neurons from Fig. 6A were immunostained with anti-p120RasGAP antibodies. Asterisks indicate GFP-expressing neurons and squares indicate untransfected neurons. Scale bar=50  $\mu$ m. (B) p120RasGAP fluorescence intensity (arbitrary units, AU;  $\pm$ SEM) of GFP-expressing neurons in (A) was measured (number of neurons=38, 37, 45, 24). Two-way ANOVA, Tukey's posttest: \*  $p < 0.0001$ .

SUPPLEMENTAL FIGURE 1.

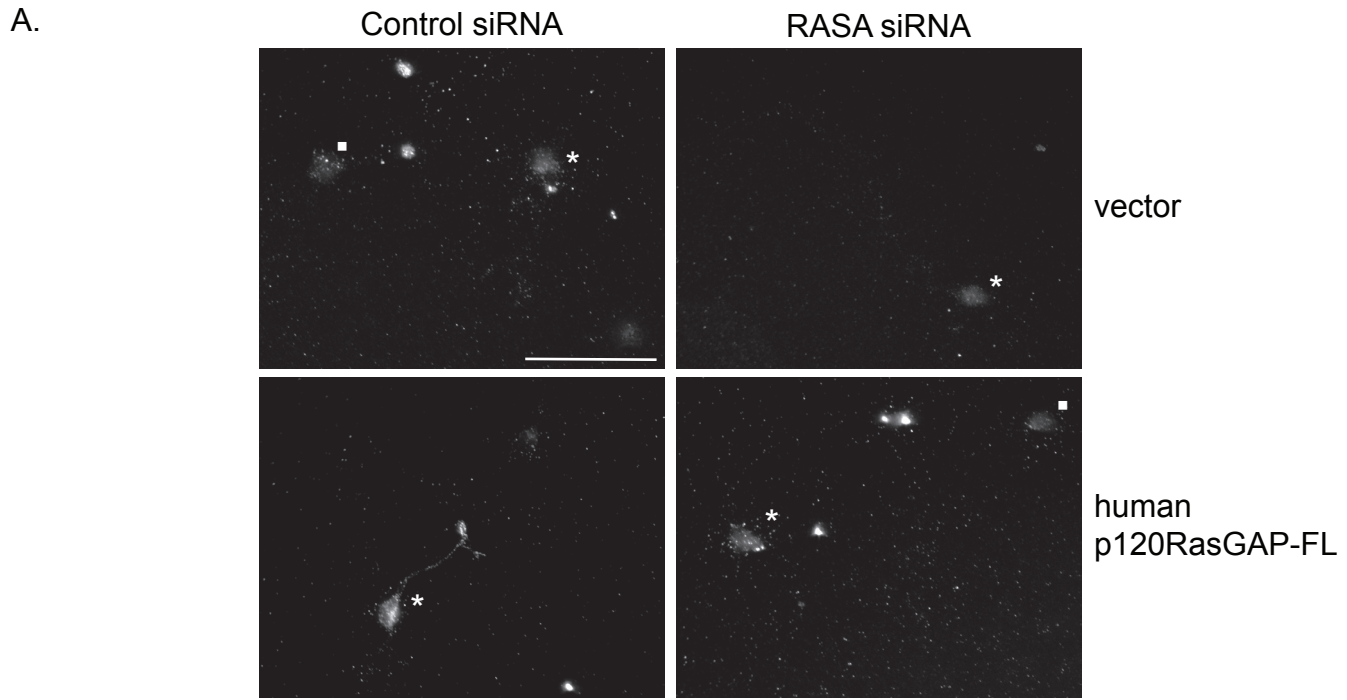

B.

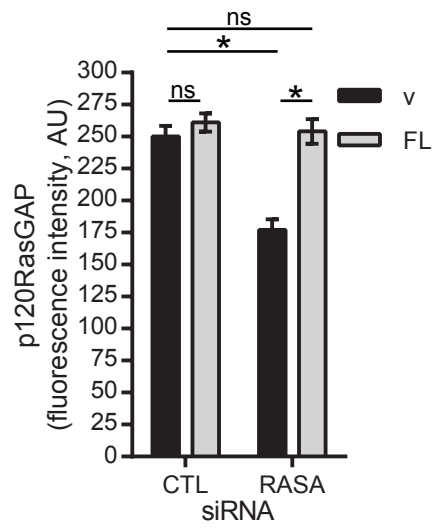

Supplement: 10.1074_M115.674846_jbc.M115.674846-1.pdf [file 10.1074_M115.674846_jbc.M115.674846-1.pdf]
